# Supplementary material for: The dynamic communities of oral microbiome in neonates
Source: PubMed Central journal article supplement (PMC9764626; doi:10.3389/fmicb.2022.1052525), 2022-12-06
Supplement: Data_Sheet_1.pdf [file Data_Sheet_1.pdf]

## Supplementary Material

Supplementary Figure 1

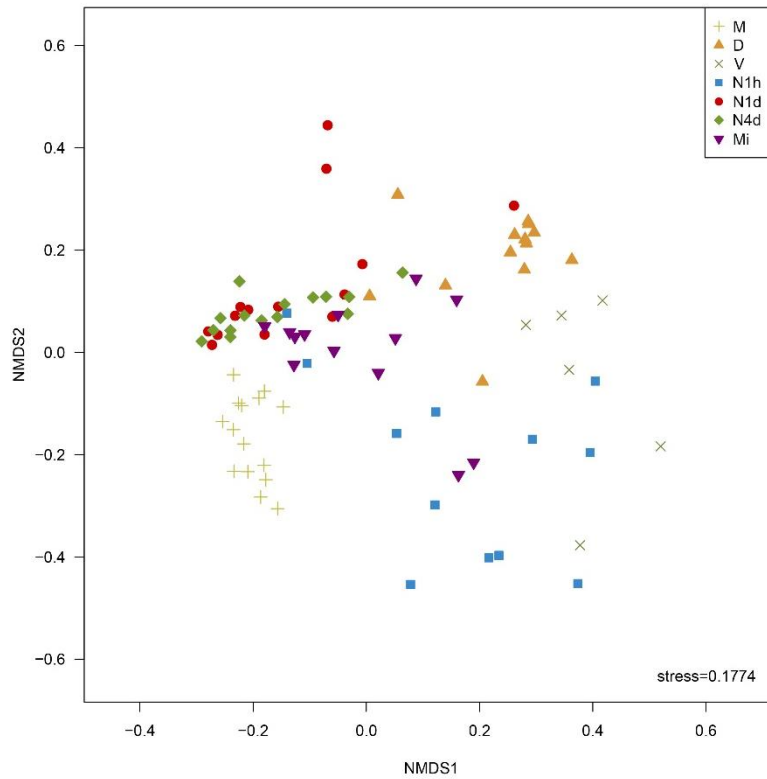

**NMDS analysis of microbiomes in the neonates and their mothers.** NMDS based on the Bray–Curtis distances illustrating the beta diversity of the microbiomes of all the groups. Each point represented a single sample.

## Supplementary Figure 2

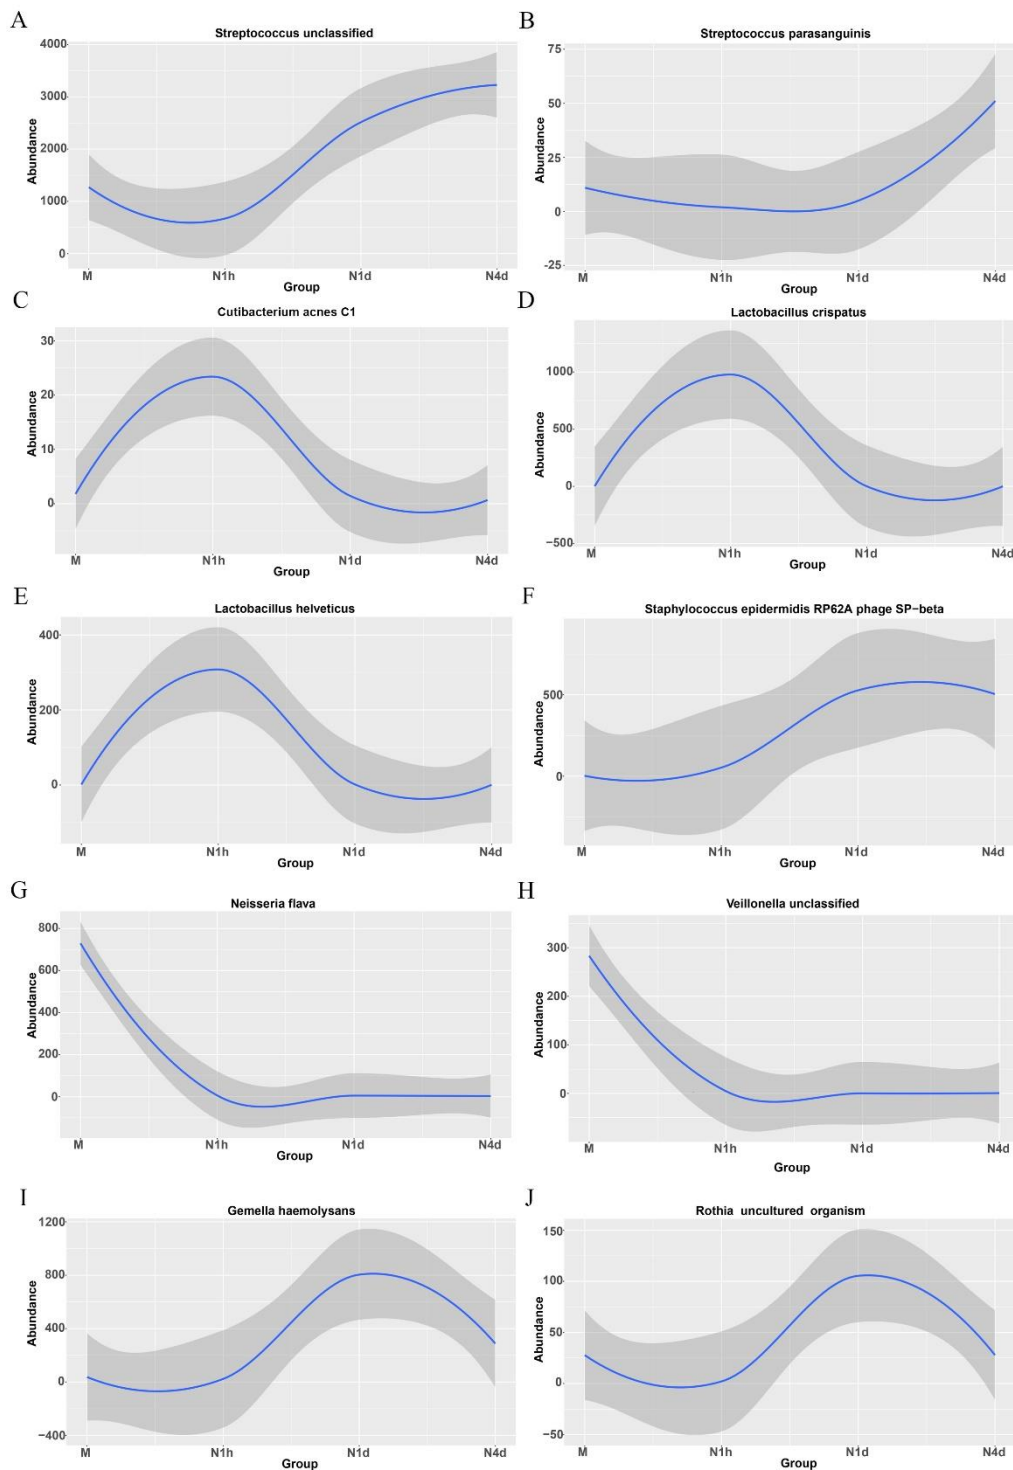

**STAMP analysis of microbiomes to investigate different bacteria among maternal oral microbiome and neonatal oral microbiomes.** STAMP analysis of neonatal groups in comparison with the M group, and then all the significant bacteria in each comparison were fit linearly. The y-coordinate represented the relative abundance of the species, and the x-coordinate represented the

name of sample groups. The relative abundances of the top 20 taxa at the species level of each group were shown.

### Supplementary Figure 3

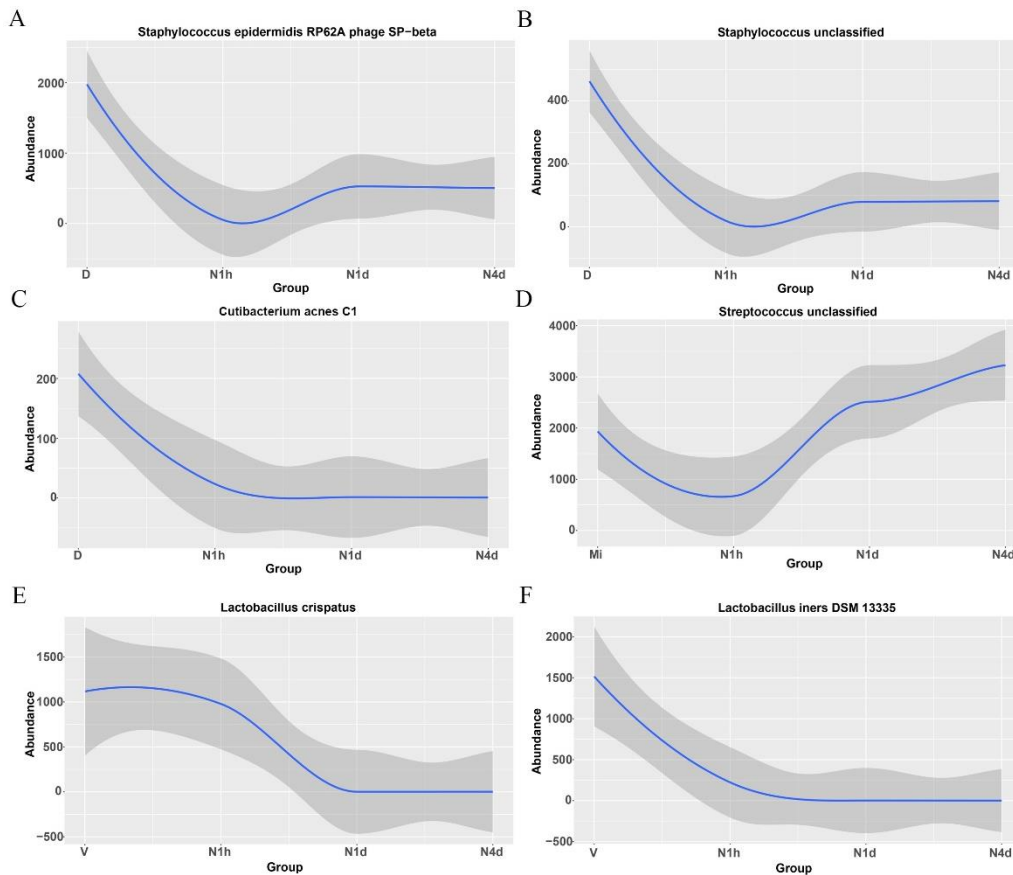

**STAMP analysis of microbiomes to investigate different bacteria among maternal microbiomes and neonatal oral microbiomes.** STAMP analysis of neonatal groups in comparison with D group (A, B and C), Mi group (D) and V group (E and F), and then all the significant bacteria in each comparison were fit linearly. The y-coordinate represented the relative abundance of the species, and the x-coordinate represented the name of sample groups. The relative abundances of the top 20 taxa at the species level of each group were shown.

### Supplementary Table 1 The shared OTUs among the maternal samples

| OTU ID | Taxonomy                                                |
|--------|---------------------------------------------------------|
| OTU11  | <i>s_Staphylococcus epidermidis RP62A phage SP_beta</i> |
| OTU13  | <i>g_Cutibacterium</i>                                  |
| OTU19  | <i>g_Haemophilus</i>                                    |
| OTU25  | <i>s_Lactobacillus helveticus</i>                       |
| OTU26  | <i>s_Aeromonas hydrophila YL17</i>                      |
| OTU41  | <i>s_Lactobacillus iners DSM 13335</i>                  |
| OTU56  | <i>s_Prevotella bivia</i>                               |
| OTU82  | <i>s_Lonsdalea quercina subsp. populi</i>               |
| OTU84  | <i>g_Curvibacter; s_unidentified</i>                    |

|        |                                                             |
|--------|-------------------------------------------------------------|
| OTU85  | <i>g_Gardnerella; s_uncultured bacterium</i>                |
| OTU87  | <i>g_Staphylococcus</i>                                     |
| OTU96  | <i>s_Capnocytophaga gingivalis</i>                          |
| OTU98  | <i>s_Bifidobacterium breve</i>                              |
| OTU100 | <i>g_Gemella</i>                                            |
| OTU113 | <i>g_Granulicatella</i>                                     |
| OTU128 | <i>s&gt;Weissella hellenica</i>                             |
| OTU130 | <i>s_Streptococcus salivarius subsp. salivarius</i>         |
| OTU136 | <i>s_Streptococcus parasanguinis</i>                        |
| OTU146 | <i>s_Lactobacillus crispatus</i>                            |
| OTU147 | <i>s_Bradyrhizobium denitrificans</i>                       |
| OTU148 | <i>s_Kocuria marina</i>                                     |
| OTU168 | <i>s_Cutibacterium avidum 44067</i>                         |
| OTU182 | <i>s_Neisseria oralis</i>                                   |
| OTU187 | <i>g_Vibrio</i>                                             |
| OTU193 | <i>s_Prevotella jejuni</i>                                  |
| OTU207 | <i>g_Escherichia_Shigella</i>                               |
| OTU209 | <i>s_Porphyrromonas gingivalis</i>                          |
| OTU210 | <i>g_Rothia; s_uncultured organism</i>                      |
| OTU223 | <i>g_Lactobacillus</i>                                      |
| OTU229 | <i>s_Pseudomonas aeruginosa VRFPA04</i>                     |
| OTU232 | <i>s_Lactobacillus delbrueckii subsp. bulgaricus ND02</i>   |
| OTU252 | <i>g_Veillonella</i>                                        |
| OTU255 | <i>s_Cutibacterium acnes C1</i>                             |
| OTU262 | <i>s_Atopobium vaginae DSM 15829</i>                        |
| OTU264 | <i>g_Streptococcus</i>                                      |
| OTU266 | <i>g_Vibrio</i>                                             |
| OTU275 | <i>s_Brevundimonas vesicularis</i>                          |
| OTU277 | <i>s_Bacteroides fragilis</i>                               |
| OTU290 | <i>s_Gemella haemolysans</i>                                |
| OTU291 | <i>s_Sphingomonas panni</i>                                 |
| OTU292 | <i>g_Prevotella 9</i>                                       |
| OTU295 | <i>s_Neisseria elongata subsp. glycolytica ATCC 29315</i>   |
| OTU310 | <i>g_norank</i>                                             |
| OTU330 | <i>g_Erwinia</i>                                            |
| OTU343 | <i>s_Micrococcus luteus</i>                                 |
| OTU349 | <i>s_Enterococcus mundtii ATCC 882</i>                      |
| OTU364 | <i>g_Streptococcus</i>                                      |
| OTU368 | <i>s_Aerococcus christensenii</i>                           |
| OTU370 | <i>f_Neisseriaceae; g_uncultured; s_uncultured organism</i> |
| OTU380 | <i>s_Neisseria flava</i>                                    |
| OTU385 | <i>s_Staphylococcus epidermidis RP62A phage SP_beta</i>     |
| OTU416 | <i>s_Colocasia esculenta taro</i>                           |

---

**Supplementary Table 2 The shared OTUs among the neonate oral groups**

| <b>OTU ID</b> | <b>Taxonomy</b>                                           |
|---------------|-----------------------------------------------------------|
| OTU1          | <i>f_Caulobacteraceae; g_uncultured</i>                   |
| OTU11         | <i>s_Staphylococcus epidermidis RP62A phage SP_beta</i>   |
| OTU13         | <i>g_Cutibacterium</i>                                    |
| OTU19         | <i>g_Haemophilus</i>                                      |
| OTU25         | <i>s_Lactobacillus helveticus</i>                         |
| OTU34         | <i>f_Planococcaceae</i>                                   |
| OTU41         | <i>s_Lactobacillus iners DSM 13335</i>                    |
| OTU84         | <i>g_Curvibacter; s_unidentified</i>                      |
| OTU85         | <i>g_Gardnerella; s_uncultured bacterium</i>              |
| OTU87         | <i>g_Staphylococcus</i>                                   |
| OTU98         | <i>s_Bifidobacterium breve</i>                            |
| OTU100        | <i>g_Gemella</i>                                          |
| OTU107        | <i>g_Pelomonas; s_uncultured bacterium</i>                |
| OTU113        | <i>g_Granulicatella</i>                                   |
| OTU118        | <i>g_Faecalibacterium</i>                                 |
| OTU123        | <i>g_Streptococcus</i>                                    |
| OTU130        | <i>s_Streptococcus salivarius subsp. salivarius</i>       |
| OTU136        | <i>s_Streptococcus parasanguinis</i>                      |
| OTU138        | <i>g_Curvibacter; s_unidentified</i>                      |
| OTU141        | <i>g_Parasutterella; s_uncultured organism</i>            |
| OTU146        | <i>s_Lactobacillus crispatus</i>                          |
| OTU149        | <i>g_Streptococcus</i>                                    |
| OTU178        | <i>g_Mesorhizobium</i>                                    |
| OTU179        | <i>g_Bacteroides</i>                                      |
| OTU198        | <i>g_Stenotrophomonas</i>                                 |
| OTU209        | <i>s_Porphyrmonas gingivalis</i>                          |
| OTU210        | <i>g_Rothia; s_uncultured organism</i>                    |
| OTU219        | <i>g_Streptococcus</i>                                    |
| OTU226        | <i>g_Bradyrhizobium</i>                                   |
| OTU227        | <i>g_Streptococcus</i>                                    |
| OTU231        | <i>s_Ralstonia insidiosa</i>                              |
| OTU232        | <i>s_Lactobacillus delbrueckii subsp. bulgaricus ND02</i> |
| OTU240        | <i>g_Undibacterium; s_uncultured bacterium</i>            |
| OTU247        | <i>s_uncultured Bosea sp.</i>                             |
| OTU252        | <i>g_Veillonella</i>                                      |
| OTU255        | <i>s_Cutibacterium acnes C1</i>                           |
| OTU262        | <i>s_Atopobium vaginae DSM 15829</i>                      |
| OTU264        | <i>g_Streptococcus</i>                                    |
| OTU277        | <i>s_Bacteroides fragilis</i>                             |
| OTU287        | <i>g_Bacillus</i>                                         |
| OTU290        | <i>s_Gemella haemolysans</i>                              |
| OTU292        | <i>g_revotella 9</i>                                      |
| OTU300        | <i>s_Clostridium butyricum</i>                            |
| OTU304        | <i>g_Bacteroides</i>                                      |

|        |                                                         |
|--------|---------------------------------------------------------|
| OTU310 | <i>g_norank</i>                                         |
| OTU327 | <i>s_Bacillus] thermocloacae</i>                        |
| OTU330 | <i>g_Erwinia</i>                                        |
| OTU349 | <i>s_Enterococcus mundtii ATCC 882</i>                  |
| OTU352 | <i>g_Actinobacillus</i>                                 |
| OTU360 | <i>s_Corynebacterium suicordis</i>                      |
| OTU364 | <i>g_Streptococcus</i>                                  |
| OTU373 | <i>s_Bacteroides dorei</i>                              |
| OTU380 | <i>s_Neisseria flava</i>                                |
| OTU385 | <i>s_Staphylococcus epidermidis RP62A phage SP_beta</i> |
| OTU387 | <i>s_Algoriphagus sp. JJ018</i>                         |
| OTU395 | <i>s_human gut metagenome</i>                           |
| OTU411 | <i>g_Acinetobacter</i>                                  |
| OTU414 | <i>g_Lawsonella; s_uncultured organism</i>              |
| OTU416 | <i>s_Colocasia esculenta taro</i>                       |

---

Supplementary Table 3 The shared OTUs among all groups

| OUT ID | Taxonomy                                                  |
|--------|-----------------------------------------------------------|
| OTU11  | <i>s_Staphylococcus epidermidis RP62A phage SP_beta</i>   |
| OTU13  | <i>g_Cutibacterium</i>                                    |
| OTU19  | <i>g_Haemophilus</i>                                      |
| OTU25  | <i>s_Lactobacillus helveticus</i>                         |
| OTU41  | <i>s_Lactobacillus iners DSM 13335</i>                    |
| OTU84  | <i>g_Curvibacter; s_unidentified</i>                      |
| OTU85  | <i>g_Gardnerella; s_uncultured bacterium</i>              |
| OTU87  | <i>g_Staphylococcus</i>                                   |
| OTU98  | <i>s_Bifidobacterium breve</i>                            |
| OTU100 | <i>g_Gemella</i>                                          |
| OTU113 | <i>g_Granulicatella</i>                                   |
| OTU130 | <i>s_Streptococcus salivarius subsp. salivarius</i>       |
| OTU136 | <i>s_Streptococcus parasanguinis</i>                      |
| OTU146 | <i>s_Lactobacillus crispatus</i>                          |
| OTU209 | <i>s_Porphyrmonas gingivalis</i>                          |
| OTU210 | <i>g_Rothia; s_uncultured organism</i>                    |
| OTU232 | <i>s_Lactobacillus delbrueckii subsp. bulgaricus ND02</i> |
| OTU252 | <i>g_Veillonella</i>                                      |
| OTU255 | <i>s_Cutibacterium acnes C1</i>                           |
| OTU262 | <i>s_Atopobium vaginae DSM 15829</i>                      |
| OTU264 | <i>g_Streptococcus</i>                                    |
| OTU277 | <i>s_Bacteroides fragilis</i>                             |
| OTU290 | <i>s_Gemella haemolysans</i>                              |
| OTU292 | <i>g_Prevotella 9</i>                                     |
| OTU310 | <i>g_norank</i>                                           |
| OTU330 | <i>g_Erwinia</i>                                          |

OTU349 s\_*Enterococcus mundtii* ATCC 882  
OTU364 g\_*Streptococcus*  
OTU380 s\_*Neisseria flava*  
OTU385 s\_*Staphylococcus epidermidis* RP62A phage SP\_beta  
OTU416 s\_*Colocasia esculenta taro*

---
