# Supplementary material for: The dynamic communities of oral microbiome in neonates
Source: Front Microbiol. 2022 Dec 6;13:1052525. doi: 10.3389/fmicb.2022.1052525 (PMC9764626; doi:10.3389/fmicb.2022.1052525)
Supplement: Supplementary file 1 [file Table_4.xlsx]

## Sheet: Sheet1
Supplementary Table 4. The reslut of the LDA among neoantes groups.
biomarker	enrich_log10mean	enrich_group	LDA_score	P_value	BS1h_mean	BS1h_sd	BS1d_mean	BS1d_sd	BS4d_mean	BS4d_sd
d__Bacteria.p__Firmicutes.c__Bacilli.o__Lactobacillales.f__Streptococcaceae	5.88857	BS4d	5.48379	0.000446432	681.5	1349.86	2599.71	1477.44	3330	990.106
d__Bacteria.p__Firmicutes.c__Bacilli.o__Lactobacillales.f__Streptococcaceae.g__Streptococcus	5.88857	BS4d	5.48379	0.000446432	681.5	1349.86	2599.71	1477.44	3330	990.106
d__Bacteria.p__Firmicutes.c__Bacilli	5.99289	BS4d	5.3136	0.00217333	2475	1683.2	4099.21	169.934	4234.13	86.6387
d__Bacteria.p__Firmicutes	5.99427	BS4d	5.29995	0.00145803	2541.67	1641.89	4101.57	167.619	4247.6	70.5051
d__Bacteria.p__Firmicutes.c__Bacilli.o__Lactobacillales.f__Lactobacillaceae.g__Lactobacillus	5.56675	BS1h	5.24242	1.2649e-05	1587.17	1876.6	3.28571	6.7531	2.13333	5.27618
d__Bacteria.p__Firmicutes.c__Bacilli.o__Lactobacillales.f__Lactobacillaceae	5.56675	BS1h	5.24239	1.2649e-05	1587.17	1876.6	3.28571	6.7531	2.13333	5.27618
d__Bacteria.p__Proteobacteria	5.39331	BS1h	5.0826	0.000747239	1064.58	1231.28	72.2143	118.023	20.5333	47.6368
d__Bacteria.p__Firmicutes.c__Bacilli.o__Lactobacillales.f__Lactobacillaceae.g__Lactobacillus.s__Lactobacillus_crispatus	5.35632	BS1h	5.03027	7.44047e-05	977.667	1446.66	0.142857	0.363137	0.533333	0.833809
d__Bacteria.p__Proteobacteria.c__Gammaproteobacteria	5.29983	BS1h	4.99147	0.000913363	858.417	1144.74	68.7143	116.814	19.9333	46.4242
d__Bacteria.p__Firmicutes.c__Bacilli.o__Bacillales.f__Family_XI.g__Gemella	5.30899	BS1d	4.985	0.0373057	27.3333	52.4272	876.714	1255.5	307.067	546.571
d__Bacteria.p__Firmicutes.c__Bacilli.o__Bacillales.f__Family_XI	5.30899	BS1d	4.985	0.0373057	27.3333	52.4272	876.714	1255.5	307.067	546.571
d__Bacteria.p__Firmicutes.c__Bacilli.o__Bacillales.f__Family_XI.g__Gemella.s__Gemella_haemolysans	5.27173	BS1d	4.9487	0.0249236	23.0833	47.2988	804.643	1140.55	288.4	507.387
d__Bacteria.p__Proteobacteria.c__Gammaproteobacteria.o__Betaproteobacteriales	5.21029	BS1h	4.90877	0.0003175	698.5	1089.23	11.4286	16.2373	6.66667	12.4652
d__Bacteria.p__Proteobacteria.c__Gammaproteobacteria.o__Betaproteobacteriales.f__Burkholderiaceae	5.20224	BS1h	4.90282	0.000103397	685.667	1087.75	6.28571	11.0205	3.6	11.7583
d__Bacteria.p__Cyanobacteria.c__Oxyphotobacteria	5.0243	BS1h	4.73975	0.00110418	455.167	749.04	6.14286	18.9366	0.266667	0.457738
d__Bacteria.p__Cyanobacteria	5.0243	BS1h	4.73975	0.00110418	455.167	749.04	6.14286	18.9366	0.266667	0.457738
d__Bacteria.p__Cyanobacteria.c__Oxyphotobacteria.o__Chloroplast	4.9819	BS1h	4.69511	0.00110418	412.833	747.744	6.14286	18.9366	0.266667	0.457738
d__Bacteria.p__Proteobacteria.c__Gammaproteobacteria.o__Betaproteobacteriales.f__Burkholderiaceae.g__Undibacterium	4.87589	BS1h	4.56884	0.0210918	323.417	1051.95	0.0714286	0.267261	0.0666667	0.258199
d__Bacteria.p__Firmicutes.c__Bacilli.o__Lactobacillales.f__Lactobacillaceae.g__Lactobacillus.s__Lactobacillus_helveticus	4.8548	BS1h	4.52447	0.000883436	308.083	421.063	1.5	3.22848	0.4	1.0556
d__Bacteria.p__Proteobacteria.c__Gammaproteobacteria.o__Betaproteobacteriales.f__Burkholderiaceae.g__Undibacterium.s__uncultured_bacterium	4.7547	BS1h	4.45552	0.0210918	244.667	792.843	0.0714286	0.267261	0.0666667	0.258199
d__Bacteria.p__Proteobacteria.c__Alphaproteobacteria	4.67841	BS1h	4.3583	0.00045155	205.25	301.915	3.5	5.76128	0.6	1.40408
d__Bacteria.p__Proteobacteria.c__Gammaproteobacteria.o__Betaproteobacteriales.f__Burkholderiaceae.g__Curvibacter.s__unidentified	4.52247	BS1h	4.20654	7.42573e-05	143.333	161.774	4.14286	9.68629	2.33333	7.94325
d__Bacteria.p__Proteobacteria.c__Gammaproteobacteria.o__Betaproteobacteriales.f__Burkholderiaceae.g__Curvibacter	4.52247	BS1h	4.20629	7.42573e-05	143.333	161.774	4.14286	9.68629	2.33333	7.94325
d__Bacteria.p__Proteobacteria.c__Gammaproteobacteria.o__Vibrionales.f__Vibrionaceae.g__Vibrio	4.28651	BS1h	4.15971	0.00125984	83.25	270.465	0	0	0	0
d__Bacteria.p__Bacteroidetes.c__Bacteroidia.o__Bacteroidales.f__Prevotellaceae.g__Prevotella_2.s__unidentified	2.43307	BS1h	4.15016	0.0221644	1.16667	2.65718	0	0	0	0
d__Bacteria.p__Proteobacteria.c__Alphaproteobacteria.o__Caulobacterales	4.43801	BS1h	4.11719	0.00312792	118	177.034	1.57143	2.68082	0.133333	0.351866
d__Bacteria.p__Proteobacteria.c__Alphaproteobacteria.o__Caulobacterales.f__Caulobacteraceae	4.4374	BS1h	4.1165	0.00312792	117.833	177.12	1.57143	2.68082	0.133333	0.351866
d__Bacteria.p__Actinobacteria.c__Actinobacteria.o__Micrococcales.f__Micrococcaceae.g__Rothia.s__uncultured_organism	4.38909	BS1d	4.09729	0.00248857	2	6.61953	105.429	161.217	27.8	39.4827
d__Bacteria.p__Actinobacteria.c__Actinobacteria.o__Micrococcales.f__Micrococcaceae.g__Rothia	4.38909	BS1d	4.09486	0.0072988	2.58333	6.54298	105.429	161.217	27.8	39.4827
d__Bacteria.p__Fusobacteria.c__Fusobacteriia.o__Fusobacteriales.f__Fusobacteriaceae.g__Fusobacterium.s__Fusobacterium_periodonticum	1.76407	BS1h	4.08501	0.0220203	0.25	0.452267	0	0	0	0
d__Bacteria.p__Bacteroidetes	4.42112	BS1h	4.07445	0.000936433	113.5	168.234	3.07143	5.03013	4.66667	8.29515
d__Bacteria.p__Bacteroidetes.c__Bacteroidia	4.42112	BS1h	4.07367	0.000936433	113.5	168.234	3.07143	5.03013	4.66667	8.29515
d__Bacteria.p__Proteobacteria.c__Gammaproteobacteria.o__Vibrionales.f__Vibrionaceae	4.28651	BS1h	4.04111	0.00125984	83.25	270.465	0	0	0	0
d__Bacteria.p__Bacteroidetes.c__Bacteroidia.o__Bacteroidales.f__Prevotellaceae.g__Prevotella_7.s__Prevotella_jejuni	2.19004	BS1h	4.02381	0.0221644	0.666667	1.49747	0	0	0	0
d__Bacteria.p__Proteobacteria.c__Gammaproteobacteria.o__Vibrionales	4.28651	BS1h	4.01917	0.00125984	83.25	270.465	0	0	0	0
d__Bacteria.p__Proteobacteria.c__Alphaproteobacteria.o__Rhodobacterales.f__Rhodobacteraceae.g__Paracoccus	2.54222	BS1h	3.95576	0.0221644	1.5	3.11886	0	0	0	0
d__Bacteria.p__Bacteroidetes.c__Bacteroidia.o__Bacteroidales.f__Prevotellaceae.g__Prevotella_7	2.28695	BS1h	3.90414	0.0221644	0.833333	1.64225	0	0	0	0
d__Bacteria.p__Bacteroidetes.c__Bacteroidia.o__Bacteroidales	4.22396	BS1h	3.89651	0.000410111	72.0833	95.3953	2.42857	4.68573	1.8	4.00357
d__Bacteria.p__Cyanobacteria.c__Oxyphotobacteria.o__Chloroplast.f__norank.g__norank.s__Colocasia_esculenta_taro	4.18071	BS1h	3.88872	0.0287896	65.25	94.0649	6.07143	18.9553	0.2	0.414039
d__Bacteria.p__Firmicutes.c__Clostridia.o__Clostridiales.f__Peptostreptococcaceae	2.36613	BS1h	3.8707	0.00627024	1	1.70561	0	0	0.0666667	0.258199
d__Bacteria.p__Firmicutes.c__Bacilli.o__Bacillales.f__Bacillaceae.g__Bacillus.s__Bacillus__thermocloacae	3.55646	BS1h	3.86735	0.00305939	15.5	36.6073	0.642857	1.00821	0.133333	0.351866
d__Bacteria.p__Proteobacteria.c__Alphaproteobacteria.o__Rhizobiales	4.17118	BS1h	3.85635	0.00366179	63.8333	101.501	1.92857	3.3158	0.4	1.12122
d__Bacteria.p__Firmicutes.c__Negativicutes.o__Selenomonadales.f__Veillonellaceae.g__Selenomonas.s__uncultured_Selenomonas_sp_	1.76407	BS1h	3.85048	0.0220203	0.25	0.452267	0	0	0	0
d__Bacteria.p__Bacteroidetes.c__Bacteroidia.o__Bacteroidales.f__Prevotellaceae	3.36613	BS1h	3.8091	0.0144512	10	14.1035	0.785714	1.52812	0.333333	0.48795
d__Bacteria.p__Bacteroidetes.c__Bacteroidia.o__Bacteroidales.f__Bacteroidaceae	3.97891	BS1h	3.80547	0.0223683	41	73.861	1.42857	3.17961	1.06667	2.81493
d__Bacteria.p__Bacteroidetes.c__Bacteroidia.o__Bacteroidales.f__Bacteroidaceae.g__Bacteroides	3.97891	BS1h	3.80487	0.0223683	41	73.861	1.42857	3.17961	1.06667	2.81493
d__Bacteria.p__Firmicutes.c__Negativicutes.o__Selenomonadales.f__Veillonellaceae.g__Selenomonas	1.76407	BS1h	3.80022	0.0220203	0.25	0.452267	0	0	0	0
d__Bacteria.p__Firmicutes.c__Bacilli.o__Bacillales.f__Bacillaceae	4.10119	BS1h	3.79746	0.00187205	54.3333	71.1533	4.85714	9.77325	0.266667	0.593617
d__Bacteria.p__Proteobacteria.c__Gammaproteobacteria.o__Betaproteobacteriales.f__Burkholderiaceae.g__Achromobacter	4.05262	BS1h	3.79233	0.00170141	48.5833	104.639	0	0	0.466667	1.80739
d__Bacteria.p__Cyanobacteria.c__Oxyphotobacteria.o__Chloroplast.f__norank.g__norank.s__Pyropia_haitanensis	2.5174	BS1h	3.78409	0.0221644	1.41667	4.0104	0	0	0	0
d__Bacteria.p__Bacteroidetes.c__Bacteroidia.o__Bacteroidales.f__Porphyromonadaceae.g__Porphyromonas.s__Porphyromonas_gingivalis	3.11302	BS1h	3.77625	0.0137613	5.58333	11.1229	0.214286	0.801784	0.333333	1.04654
d__Bacteria.p__Firmicutes.c__Bacilli.o__Bacillales.f__Bacillaceae.g__Caldalkalibacillus	2.5657	BS1h	3.77294	0.0221644	1.58333	4.58175	0	0	0	0
d__Bacteria.p__Firmicutes.c__Bacilli.o__Lactobacillales.f__Streptococcaceae.g__Streptococcus.s__Streptococcus_parasanguinis	4.07427	BS4d	3.75721	0.00396079	1.91667	6.33114	5	10.5975	51.0667	79.2757
d__Bacteria.p__Firmicutes.c__Bacilli.o__Bacillales.f__Bacillaceae.g__Caldalkalibacillus.s__uncultured_bacterium	2.5657	BS1h	3.75435	0.0221644	1.58333	4.58175	0	0	0	0
d__Bacteria.p__Actinobacteria.c__Actinobacteria.o__Propionibacteriales	4.03358	BS1h	3.73998	0.000730907	46.5	56.7426	1.78571	3.06791	1.06667	2.57645
d__Bacteria.p__Actinobacteria.c__Actinobacteria.o__Propionibacteriales.f__Propionibacteriaceae.g__Cutibacterium	4.03358	BS1h	3.73973	0.000730907	46.5	56.7426	1.78571	3.06791	1.06667	2.57645
d__Bacteria.p__Actinobacteria.c__Actinobacteria.o__Propionibacteriales.f__Propionibacteriaceae	4.03358	BS1h	3.7397	0.000730907	46.5	56.7426	1.78571	3.06791	1.06667	2.57645
d__Bacteria.p__Proteobacteria.c__Alphaproteobacteria.o__Rhizobiales.f__Beijerinckiaceae.g__Methylobacterium.s__Methylobacterium_fujisawaense	2.68489	BS1h	3.73577	0.0242434	2.08333	4.23102	0.214286	0.801784	0	0
d__Bacteria.p__Proteobacteria.c__Gammaproteobacteria.o__Enterobacteriales	3.99195	BS1h	3.72359	2.34215e-05	42.25	53.0422	0.5	1.09193	0.2	0.774597
d__Bacteria.p__Proteobacteria.c__Gammaproteobacteria.o__Enterobacteriales.f__Enterobacteriaceae	3.99195	BS1h	3.72209	2.34215e-05	42.25	53.0422	0.5	1.09193	0.2	0.774597
d__Bacteria.p__Firmicutes.c__Bacilli.o__Bacillales.f__Bacillaceae.g__Bacillus	3.99875	BS1h	3.698	0.0017634	42.9167	63.2534	2.28571	4.4623	0.266667	0.593617
d__Bacteria.p__Actinobacteria.c__Actinobacteria.o__Micrococcales.f__Micrococcaceae.g__Rothia.s__Rothia_dentocariosa	2.0651	BS1h	3.67104	0.0221644	0.5	1	0	0	0	0
d__Bacteria.p__Bacteroidetes.c__Bacteroidia.o__Bacteroidales.f__Prevotellaceae.g__Prevotella_2	2.5657	BS1h	3.65475	0.00547228	1.58333	2.84312	0	0	0	0
d__Bacteria.p__Firmicutes.c__Bacilli.o__Bacillales.f__Planococcaceae	3.65243	BS1h	3.64003	0.0330166	19.3333	34.7127	6.85714	24.2419	0.733333	2.31352
d__Bacteria.p__Firmicutes.c__Clostridia	3.86787	BS1h	3.62343	0.000690165	31.75	40.2405	1.71429	3.62531	0.8	1.65616
d__Bacteria.p__Proteobacteria.c__Alphaproteobacteria.o__Caulobacterales.f__Caulobacteraceae.g__Brevundimonas.s__Brevundimonas_vesicularis	3.07228	BS1h	3.62167	0.00309275	5.08333	8.60717	0.214286	0.578934	0	0
d__Bacteria.p__Firmicutes.c__Clostridia.o__Clostridiales	3.86787	BS1h	3.62024	0.000690165	31.75	40.2405	1.71429	3.62531	0.8	1.65616
d__Bacteria.p__Proteobacteria.c__Alphaproteobacteria.o__Caulobacterales.f__Caulobacteraceae.g__Brevundimonas	3.07228	BS1h	3.60435	0.00309275	5.08333	8.60717	0.214286	0.578934	0	0
d__Bacteria.p__Bacteroidetes.c__Bacteroidia.o__Bacteroidales.f__Prevotellaceae.g__Prevotella.s__Prevotella_intermedia	2.43307	BS1h	3.60294	0.0221283	1.16667	2.88675	0	0	0	0
d__Bacteria.p__Proteobacteria.c__Gammaproteobacteria.o__Pseudomonadales.f__Moraxellaceae.g__Enhydrobacter	2.5174	BS1h	3.56244	0.00169263	1.41667	2.35327	0	0	0.133333	0.516398
d__Bacteria.p__Bacteroidetes.c__Bacteroidia.o__Bacteroidales.f__Porphyromonadaceae.g__Porphyromonas.s__Porphyromonas_endodontalis	2.43307	BS1h	3.53573	0.0221644	1.16667	2.65718	0	0	0	0
d__Bacteria.p__Actinobacteria.c__Actinobacteria.o__Propionibacteriales.f__Propionibacteriaceae.g__Cutibacterium.s__Cutibacterium acnes C1	3.73565	BS1h	3.53477	0.00625109	23.4167	26.1897	1.42857	2.59331	0.666667	1.34519
d__Bacteria.p__Proteobacteria.c__Gammaproteobacteria.o__Enterobacteriales.f__Enterobacteriaceae.g__Erwinia	3.80016	BS1h	3.52891	0.00431178	27.1667	46.0668	0.428571	1.08941	0.133333	0.516398
d__Bacteria.p__Proteobacteria.c__Gammaproteobacteria.o__Betaproteobacteriales.f__Burkholderiaceae.g__Comamonas.s__Ottowia_sp__oral_taxon_894	2.13204	BS1h	3.50752	0.0221283	0.583333	1.44338	0	0	0	0
d__Bacteria.p__Bacteroidetes.c__Bacteroidia.o__Bacteroidales.f__Prevotellaceae.g__Prevotella_1	1.98592	BS1h	3.48911	0.0221283	0.416667	0.792961	0	0	0	0
d__Bacteria.p__Proteobacteria.c__Alphaproteobacteria.o__Rhodobacterales	2.66716	BS1h	3.4772	0.00547228	2	3.3303	0	0	0	0
d__Bacteria.p__Bacteroidetes.c__Bacteroidia.o__Bacteroidales.f__Prevotellaceae.g__Prevotella_1.s__Prevotella_sp__oral_clone_DA058	1.98592	BS1h	3.46715	0.0221283	0.416667	0.792961	0	0	0	0
d__Bacteria.p__Proteobacteria.c__Gammaproteobacteria.o__Betaproteobacteriales.f__Burkholderiaceae.g__Comamonas	2.13204	BS1h	3.46296	0.0221283	0.583333	1.44338	0	0	0	0
d__Bacteria.p__Proteobacteria.c__Gammaproteobacteria.o__Betaproteobacteriales.f__Burkholderiaceae.g__Acidovorax	3.44531	BS1h	3.45881	0.0221644	12	30.5703	0	0	0	0
d__Bacteria.p__Firmicutes.c__Clostridia.o__Clostridiales.f__Family_XI	3.44831	BS1h	3.44423	0.0313939	12.0833	21.2109	0.5	1.60528	0.133333	0.351866
d__Bacteria.p__Proteobacteria.c__Alphaproteobacteria.o__Sphingomonadales.f__Sphingomonadaceae.g__Sphingomonas.s__uncultured_bacterium	3.31225	BS1h	3.43385	0.0221644	8.83333	22.3641	0	0	0	0
d__Bacteria.p__Firmicutes.c__Negativicutes.o__Selenomonadales.f__Veillonellaceae	3.70359	BS1h	3.42364	0.000671576	21.75	31.7322	0.357143	1.33631	12.6	44.4455
d__Bacteria.p__Firmicutes.c__Negativicutes	3.70359	BS1h	3.42218	0.000671576	21.75	31.7322	0.357143	1.33631	12.6	44.4455
d__Bacteria.p__Firmicutes.c__Negativicutes.o__Selenomonadales	3.70359	BS1h	3.41675	0.000671576	21.75	31.7322	0.357143	1.33631	12.6	44.4455
d__Bacteria.p__Firmicutes.c__Bacilli.o__Bacillales.f__Bacillaceae.g__Bacillus.s__uncultured_compost_bacterium_4_75	2.83101	BS1h	3.41194	0.00552178	2.91667	5.36755	0	0	0.0666667	0.258199
d__Bacteria.p__Bacteroidetes.c__Bacteroidia.o__Chitinophagales	3.70525	BS1h	3.41096	0.00136707	21.8333	48.2924	0	0	0.266667	1.0328
d__Bacteria.p__Bacteroidetes.c__Bacteroidia.o__Chitinophagales.f__Chitinophagaceae.g__Sediminibacterium	2.76407	BS1h	3.3983	0.0295106	2.5	6.28852	0	0	0.266667	1.0328
d__Bacteria.p__Bacteroidetes.c__Bacteroidia.o__Chitinophagales.f__Chitinophagaceae.g__Sediminibacterium.s__uncultured_bacterium	2.76407	BS1h	3.39535	0.0295106	2.5	6.28852	0	0	0.266667	1.0328
d__Bacteria.p__Firmicutes.c__Clostridia.o__Clostridiales.f__Family_XI.g__Anaerococcus	3.01934	BS1h	3.39371	0.0232357	4.5	13.4401	0	0	0.0666667	0.258199
d__Bacteria.p__Bacteroidetes.c__Bacteroidia.o__Bacteroidales.f__Porphyromonadaceae.g__Porphyromonas	3.40089	BS1h	3.3751	0.000522528	10.8333	15.5787	0.214286	0.801784	0.333333	1.04654
d__Bacteria.p__Actinobacteria.c__Actinobacteria.o__Micrococcales.f__Microbacteriaceae.g__Microbacterium.s__Microbacterium_trichothecenolyticum	3.00295	BS1h	3.36656	0.0118611	4.33333	7.36495	0.214286	0.578934	0	0
d__Bacteria.p__Bacteroidetes.c__Bacteroidia.o__Bacteroidales.f__Porphyromonadaceae	3.40089	BS1h	3.36546	0.000522528	10.8333	15.5787	0.214286	0.801784	0.333333	1.04654
d__Bacteria.p__Proteobacteria.c__Alphaproteobacteria.o__Sphingomonadales.f__Sphingomonadaceae	3.64297	BS1h	3.35939	6.74512e-06	18.9167	27.9723	0	0	0.0666667	0.258199
d__Bacteria.p__Proteobacteria.c__Alphaproteobacteria.o__Sphingomonadales	3.64297	BS1h	3.35933	6.74512e-06	18.9167	27.9723	0	0	0.0666667	0.258199
d__Bacteria.p__Proteobacteria.c__Gammaproteobacteria.o__Betaproteobacteriales.f__Burkholderiaceae.g__Pelomonas	3.49377	BS1h	3.34736	0.0302145	13.4167	30.6756	0.142857	0.534522	0.133333	0.516398
d__Bacteria.p__Firmicutes.c__Bacilli.o__Bacillales.f__Thermoactinomycetaceae.g__Planifilum.s__uncultured_compost_bacterium	2.95904	BS1h	3.33168	0.0221644	3.91667	11.1637	0	0	0	0
d__Bacteria.p__Proteobacteria.c__Gammaproteobacteria.o__Betaproteobacteriales.f__Burkholderiaceae.g__Pelomonas.s__uncultured_bacterium	3.49377	BS1h	3.32705	0.0302145	13.4167	30.6756	0.142857	0.534522	0.133333	0.516398
d__Bacteria.p__Proteobacteria.c__Alphaproteobacteria.o__Sphingomonadales.f__Sphingomonadaceae.g__Sphingomonas	3.5858	BS1h	3.30643	1.62206e-06	16.5833	27.9593	0	0	0	0
d__Bacteria.p__Bacteroidetes.c__Bacteroidia.o__Flavobacteriales	3.16776	BS1h	3.29901	0.0177037	6.33333	10.5083	0.5	1.87083	2	5.11301
d__Bacteria.p__Bacteroidetes.c__Bacteroidia.o__Sphingobacteriales.f__Sphingobacteriaceae	3.38732	BS1h	3.2746	0.0269035	10.5	33.2689	0.0714286	0.267261	0.266667	1.0328
d__Bacteria.p__Actinobacteria.c__Actinobacteria.o__Micrococcales.f__Microbacteriaceae.g__Microbacterium	3.00295	BS1h	3.26667	0.0118611	4.33333	7.36495	0.214286	0.578934	0	0
d__Bacteria.p__Bacteroidetes.c__Bacteroidia.o__Sphingobacteriales	3.39754	BS1h	3.26499	0.00174583	10.75	33.1885	0.0714286	0.267261	0.266667	1.0328
d__Bacteria.p__Bacteroidetes.c__Bacteroidia.o__Bacteroidales.f__Bacteroidaceae.g__Bacteroides.s__Bacteroides_dorei	3.56341	BS1h	3.26369	0.0484349	15.75	36.9351	0.428571	1.60357	0.333333	1.04654
d__Bacteria.p__Firmicutes.c__Negativicutes.o__Selenomonadales.f__Veillonellaceae.g__Veillonella	3.45485	BS4d	3.26333	0.00960357	5.75	10.0102	0.0714286	0.267261	12.2667	44.5268
d__Bacteria.p__Bacteroidetes.c__Bacteroidia.o__Sphingobacteriales.f__Sphingobacteriaceae.g__Sphingobacterium	3.38732	BS1h	3.26123	0.0269035	10.5	33.2689	0.0714286	0.267261	0.266667	1.0328
d__Bacteria.p__Proteobacteria.c__Alphaproteobacteria.o__Sphingomonadales.f__Sphingomonadaceae.g__Sphingomonas.s__Sphingomonas_panni	2.87801	BS1h	3.25433	0.00546292	3.25	9.44	0	0	0	0
d__Bacteria.p__Proteobacteria.c__Alphaproteobacteria.o__Rhizobiales.f__Beijerinckiaceae	3.42683	BS1h	3.25372	0.00454938	11.5	18.7738	0.571429	1.15787	0.133333	0.516398
d__Bacteria.p__Firmicutes.c__Negativicutes.o__Selenomonadales.f__Veillonellaceae.g__Mitsuokella	3.39416	BS1h	3.25097	0.00538903	10.6667	28.0659	0.285714	1.06904	0.133333	0.516398
d__Bacteria.p__Bacteroidetes.c__Bacteroidia.o__Chitinophagales.f__Chitinophagaceae	3.45721	BS1h	3.24865	0.00136707	12.3333	19.6345	0	0	0.266667	1.0328
d__Bacteria.p__Proteobacteria.c__Gammaproteobacteria.o__Pseudomonadales	3.49913	BS1h	3.2441	0.000488776	13.5833	20.1425	0.428571	0.851631	6.86667	24.7238
d__Bacteria.p__Proteobacteria.c__Alphaproteobacteria.o__Rhizobiales.f__Beijerinckiaceae.g__Bosea.s__uncultured_Bosea_sp_	3.32834	BS1h	3.24374	0.00106575	9.16667	14.8314	0.142857	0.534522	0.133333	0.516398
d__Bacteria.p__Proteobacteria.c__Alphaproteobacteria.o__Rhizobiales.f__Beijerinckiaceae.g__Bosea	3.32834	BS1h	3.23538	0.00106575	9.16667	14.8314	0.142857	0.534522	0.133333	0.516398
d__Bacteria.p__Firmicutes.c__Bacilli.o__Bacillales.f__Thermoactinomycetaceae	3.48834	BS1h	3.23451	0.00516475	13.25	31.5368	0	0	0.133333	0.516398
d__Bacteria.p__Firmicutes.c__Clostridia.o__Clostridiales.f__Lachnospiraceae.g__Eubacterium__eligens_group	3.22144	BS1h	3.23218	0.0228089	7.16667	16.916	0.0714286	0.267261	0	0
d__Bacteria.p__Firmicutes.c__Negativicutes.o__Selenomonadales.f__Veillonellaceae.g__Mitsuokella.s__uncultured_bacterium	3.39416	BS1h	3.23031	0.00126423	10.6667	28.0659	0	0	0.133333	0.516398
d__Bacteria.p__Firmicutes.c__Limnochordia.o__Limnochordales.f__Limnochordaceae	3.42367	BS1h	3.23027	0.0232357	11.4167	26.4075	0	0	0.0666667	0.258199
d__Bacteria.p__Proteobacteria.c__Gammaproteobacteria.o__Enterobacteriales.f__Enterobacteriaceae.g__Klebsiella	2.74934	BS1h	3.22761	0.0055284	2.41667	5.16031	0	0	0.0666667	0.258199
d__Bacteria.p__Firmicutes.c__Limnochordia.o__Limnochordales	3.42367	BS1h	3.22042	0.0232357	11.4167	26.4075	0	0	0.0666667	0.258199
d__Bacteria.p__Proteobacteria.c__Gammaproteobacteria.o__Enterobacteriales.f__Enterobacteriaceae.g__Klebsiella.s__Klebsiella_michiganensis_HKOPL1	2.74934	BS1h	3.21808	0.0055284	2.41667	5.16031	0	0	0.0666667	0.258199
d__Bacteria.p__Actinobacteria.c__Actinobacteria.o__Micrococcales.f__Micrococcaceae.g__Kocuria	3.4108	BS1h	3.21146	0.0055284	11.0833	18.2978	0	0	0.0666667	0.258199
d__Bacteria.p__Firmicutes.c__Limnochordia	3.42367	BS1h	3.21096	0.0232357	11.4167	26.4075	0	0	0.0666667	0.258199
d__Bacteria.p__Firmicutes.c__Bacilli.o__Lactobacillales.f__Leuconostocaceae.g__Weissella	2.83101	BS1h	3.19485	0.00179474	2.91667	5.85364	0.214286	0.801784	0	0
d__Bacteria.p__Proteobacteria.c__Alphaproteobacteria.o__Rhodobacterales.f__Rhodobacteraceae	2.66716	BS1h	3.18541	0.00547228	2	3.3303	0	0	0	0
d__Bacteria.p__Proteobacteria.c__Gammaproteobacteria.o__Enterobacteriales.f__Enterobacteriaceae.g__Escherichia_Shigella	3.38386	BS1h	3.18385	5.29564e-05	10.4167	19.8515	0	0	0	0
d__Bacteria.p__Proteobacteria.c__Gammaproteobacteria.o__Pseudomonadales.f__Moraxellaceae	3.41728	BS1h	3.18212	0.000868407	11.25	16.5701	0.428571	0.851631	6.86667	24.7238
d__Bacteria.p__Firmicutes.c__Bacilli.o__Lactobacillales.f__Leuconostocaceae.g__Weissella.s__Weissella_hellenica	2.83101	BS1h	3.17978	0.00179474	2.91667	5.85364	0.214286	0.801784	0	0
d__Bacteria.p__Firmicutes.c__Bacilli.o__Lactobacillales.f__Leuconostocaceae	2.83101	BS1h	3.17716	0.00179474	2.91667	5.85364	0.214286	0.801784	0	0
d__Bacteria.p__Actinobacteria.c__Actinobacteria.o__Micrococcales.f__Micrococcaceae.g__Kocuria.s__Kocuria_marina	3.34764	BS1h	3.16895	0.0055284	9.58333	17.7838	0	0	0.0666667	0.258199
d__Bacteria.p__Actinobacteria.c__Actinobacteria.o__Micrococcales.f__Microbacteriaceae	3.34385	BS1h	3.16087	0.019613	9.5	18.1384	0.428571	0.937614	0	0
d__Bacteria.p__Proteobacteria.c__Gammaproteobacteria.o__Betaproteobacteriales.f__Burkholderiaceae.g__Massilia	3.17904	BS1h	3.1461	0.00547228	6.5	11.882	0	0	0	0
d__Bacteria.p__Proteobacteria.c__Gammaproteobacteria.o__Pseudomonadales.f__Pseudomonadaceae.g__Pseudomonas.s__Pseudomonas_parafulva	2.71831	BS1h	3.13766	0.000268494	2.25	5.06548	0	0	0	0
d__Bacteria.p__Actinobacteria.c__Actinobacteria.o__Streptosporangiales.f__Nocardiopsaceae.g__Thermobifida	3.26007	BS1h	3.13586	0.0221644	7.83333	20.3552	0	0	0	0
d__Bacteria.p__Proteobacteria.c__Gammaproteobacteria.o__Pseudomonadales.f__Pseudomonadaceae.g__Pseudomonas	2.7341	BS1h	3.13246	0.000268494	2.33333	5.08712	0	0	0	0
d__Bacteria.p__Proteobacteria.c__Gammaproteobacteria.o__Pseudomonadales.f__Pseudomonadaceae	2.7341	BS1h	3.12024	0.000268494	2.33333	5.08712	0	0	0	0
d__Bacteria.p__Actinobacteria.c__Actinobacteria.o__Streptosporangiales.f__Nocardiopsaceae	3.26007	BS1h	3.11566	0.0221644	7.83333	20.3552	0	0	0	0
d__Archaea	2.49107	BS1h	3.10952	0.0221644	1.33333	3.72542	0	0	0	0
d__Bacteria.p__Firmicutes.c__Erysipelotrichia.o__Erysipelotrichales.f__Erysipelotrichaceae	2.60917	BS1h	3.10054	0.00861053	1.75	4.24532	0.285714	1.06904	0	0
d__Bacteria.p__Proteobacteria.c__Gammaproteobacteria.o__Betaproteobacteriales.f__Burkholderiaceae.g__Massilia.s__uncultured_bacterium	2.76407	BS1h	3.09424	0.0221644	2.5	5.97723	0	0	0	0
d__Bacteria.p__Actinobacteria.c__Actinobacteria.o__Streptosporangiales	3.26007	BS1h	3.08865	0.0221644	7.83333	20.3552	0	0	0	0
d__Bacteria.p__Proteobacteria.c__Gammaproteobacteria.o__Betaproteobacteriales.f__Burkholderiaceae.g__Massilia.s__Massilia_dura	2.96819	BS1h	3.08794	0.0221644	4	7.28635	0	0	0	0
d__Bacteria.p__Actinobacteria.c__Actinobacteria.o__Streptosporangiales.f__Nocardiopsaceae.g__Thermobifida.s__Thermobifida_fusca	3.26007	BS1h	3.08039	0.0221644	7.83333	20.3552	0	0	0	0
d__Bacteria.p__Firmicutes.c__Erysipelotrichia.o__Erysipelotrichales.f__Erysipelotrichaceae.g__Erysipelothrix	2.60917	BS1h	3.07081	0.00861053	1.75	4.24532	0.285714	1.06904	0	0
d__Bacteria.p__Firmicutes.c__Erysipelotrichia.o__Erysipelotrichales	2.60917	BS1h	3.06468	0.00861053	1.75	4.24532	0.285714	1.06904	0	0
d__Bacteria.p__Firmicutes.c__Erysipelotrichia	2.60917	BS1h	3.05071	0.00861053	1.75	4.24532	0.285714	1.06904	0	0
d__Bacteria.p__Firmicutes.c__Erysipelotrichia.o__Erysipelotrichales.f__Erysipelotrichaceae.g__Erysipelothrix.s__Erysipelothrix_rhusiopathiae_str__Fujisawa	2.60917	BS1h	3.05007	0.00861053	1.75	4.24532	0.285714	1.06904	0	0
d__Bacteria.p__Proteobacteria.c__Alphaproteobacteria.o__Sphingomonadales.f__Sphingomonadaceae.g__Sphingomonas.s__Sphingomonas_echinoides	2.9304	BS1h	3.0408	5.29564e-05	3.66667	6.44323	0	0	0	0
d__Bacteria.p__Firmicutes.c__Bacilli.o__uncultured.f__uncultured.g__uncultured	3.10649	BS1h	2.98365	0.0221644	5.5	14.7433	0	0	0	0
d__Bacteria.p__Firmicutes.c__Bacilli.o__uncultured	3.10649	BS1h	2.98164	0.0221644	5.5	14.7433	0	0	0	0
d__Bacteria.p__Firmicutes.c__Bacilli.o__uncultured.f__uncultured	3.10649	BS1h	2.96898	0.0221644	5.5	14.7433	0	0	0	0
d__Bacteria.p__Firmicutes.c__Bacilli.o__uncultured.f__uncultured.g__uncultured.s__uncultured_bacterium	3.10649	BS1h	2.96407	0.0221644	5.5	14.7433	0	0	0	0
